# Supplementary material for: Perspectives of attenders and non-attenders to SARS-CoV-2 asymptomatic community testing in England: a qualitative interview study
Source: HighWire-hosted journal article supplement (doi:10.1136/bmjopen-2022-064542), 2022-09-01
Supplement: bmjopen-2022-064542supp003_data_supplement.pdf [file bmjopen-2022-064542supp003_data_supplement.pdf]

Supplementary File 3. Thematic map of themes and subthemes

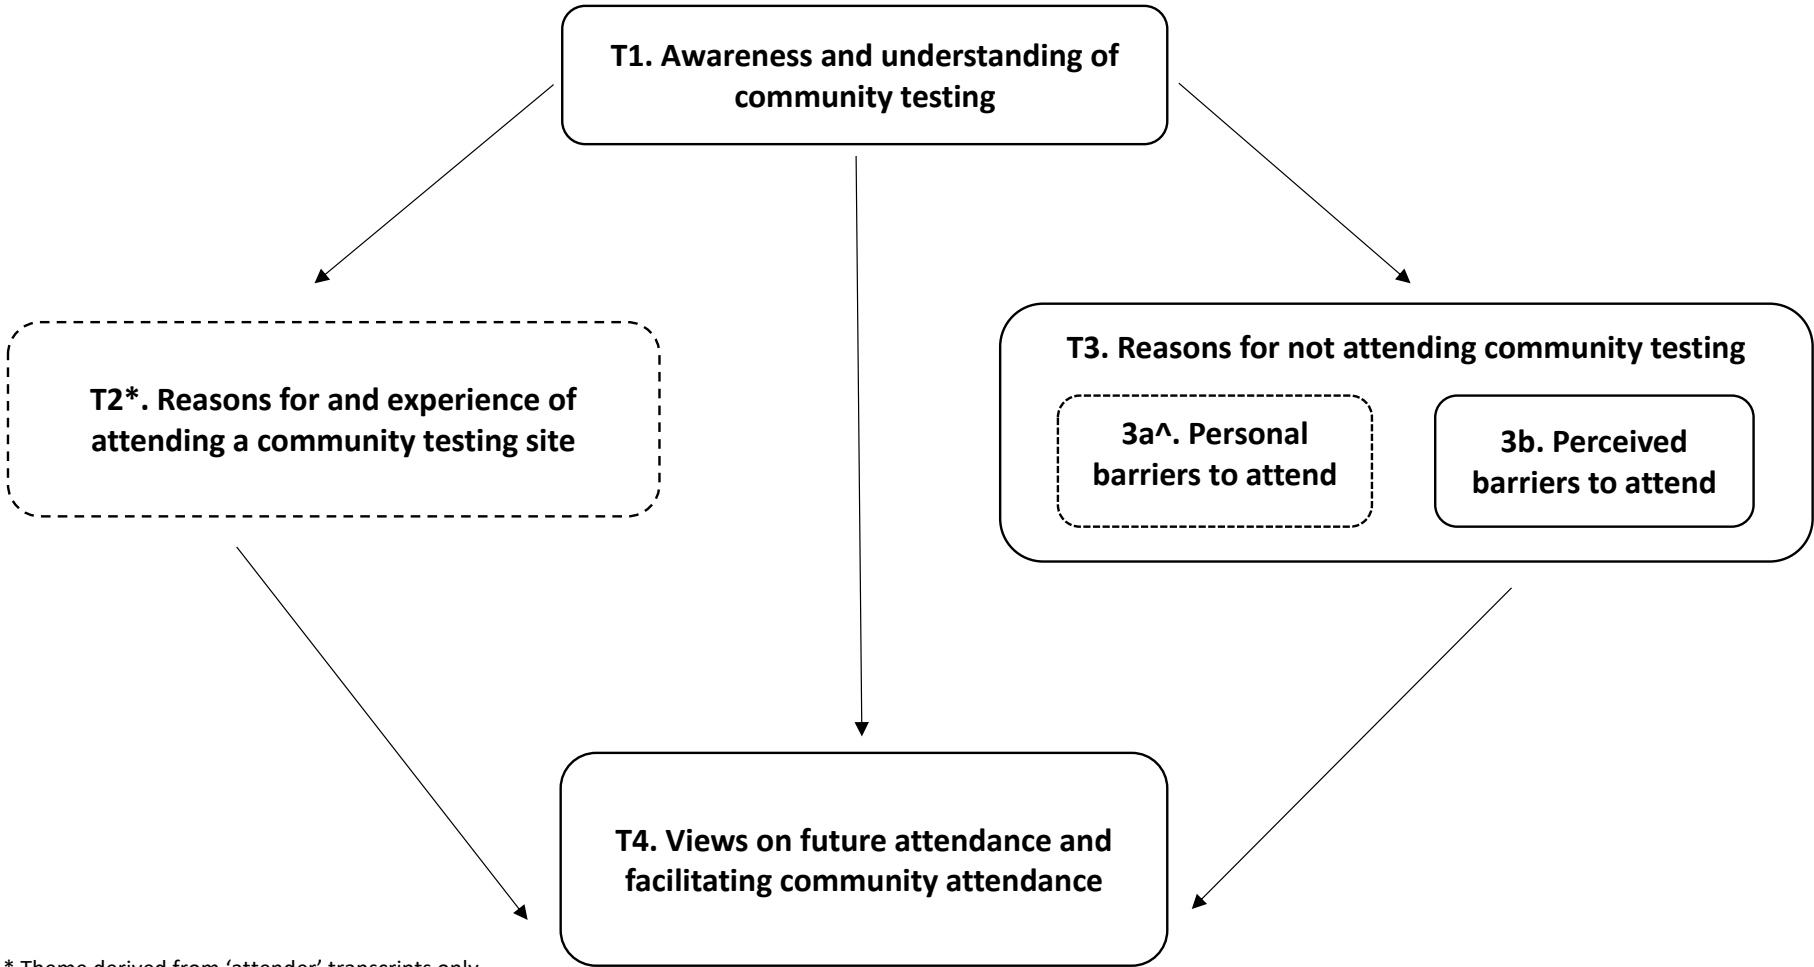

\* Theme derived from ‘attender’ transcripts only  
^ Sub-theme derived from ‘non-attender’ transcripts only
